# Supplementary material
Source: PubMed Central journal article supplement (PMC2914580)
Supplement: erq028_1.pdf [file erq028_1.pdf]

# Glyoxylate rather than ascorbate is an efficient precursor for oxalate biosynthesis in rice

*Le Yu, Jingzhe Jiang, Chan Zhang, Linring Jiang, Nenghui Ye, Yusheng Lu, Guozhen Yang, Ee Liu, Changlian Peng, Zhenghui He, and Xinxiang Peng*

## Supplementary Material

**Table S1** The primer sequences used for quantifying the gene expression

| Gene         | GeneBank accession no | Forward(5'-3') | Reverse(5'-3') | Product (bp) |
|--------------|-----------------------|----------------|----------------|--------------|
| <i>SGAT</i>  | AK064774              | AGCTGAGGATCCG  | AGGACGAAGCTT   | 710          |
|              |                       | AGATGGCGGACTAC | GACTTGGCCGTCT  |              |
|              |                       | GTGTAT         | TGCTC          |              |
| <i>GGAT</i>  | AK067732              | ATTTGGATCCTGCG | TACCAGGGATAACC | 330          |
|              |                       | GCAAGATGTTCGG  | TCGGGA         |              |
| <i>HPR-1</i> | AK072105              | CCAATAGGAACGGC | GGCAGATGCGATG  | 343          |
|              |                       | ATCG           | TGAGG          |              |
| <i>ICL</i>   | AK063353              | GGTGGGGAACGGA  | TTGCGGTCGTGGT  | 358          |
|              |                       | CAGGT          | AGAGC          |              |
| <i>GLDH</i>  | AK102697              | TTAAGAGCTCGACT | GCCCAAGCTTAA   | 452          |
|              |                       | CCCTCCCCGCC    | GTCCACAGCGAG   |              |
|              |                       |                | CAA            |              |
